# Supplementary material for: Molecular Spin Sensor for In-Situ Monitoring of Crystallization Behavior and Phase Transition in Aromatic Materials
Source: Research Square preprint supplement (doi:10.21203/rs.3.rs-6145981/v1), 2025-03-19
Supplement: Supplementary file 1 [file 9e74f9bd67bf1d4eda8ed068.docx]

**Supplementary information**

**Molecular Spin Sensor for In-Situ Monitoring of Crystallization Behavior and Phase Transition in Aromatic Materials**

**Linshan Liu,1,5 Chong Zhao,3 Yingjian Zhang,1 Zhuxia Zhang,4 Chunru Wang,2 and Taishan Wang*1**

1MOE Key Laboratory of Cluster Science, School of Chemistry and Chemical Engineering, Beijing Institute of Technology, Beijing 102488, China

2Beijing National Laboratory for Molecular Sciences, Key Laboratory of Molecular Nanostructure and Nanotechnology, Institute of Chemistry, Chinese Academy of Sciences, Beijing 100190, China

3State Key Laboratory of Functions and Applications of Medicinal Plants, College of Pharmacy, Guizhou Medical University, Guiyang 550025, China

4College of Chemistry, Taiyuan University of Technology, Taiyuan 030024, China

5College of Chemistry, Beijing Normal University, Beijing 100875, China

E-mail: wangtais@bit.edu.cn

**Table of Contents**

1. **Synthesis and Separation of Y2@C79N**
2. **EPR measurements of Y2@C79N**
3. **XRD and POM measurements of materials**

**1.Synthesis and Separation of Y2@C79N**

Y2@C79N was synthesized by the arc-discharge method. Figure S1a shows the first stage HPLC separation on Buckyprep column. Figure S1b shows the HPLC chromatogram of isolated Y2@C79N on Buckyprep column. The purity of Y2@C79N was determined by matrix-assisted laser desorption/ionization time-of-flight mass spectrometry (MALDI-TOF-MS, AXIMA Assurance, Shimadzu), as shown in Figure S1c.


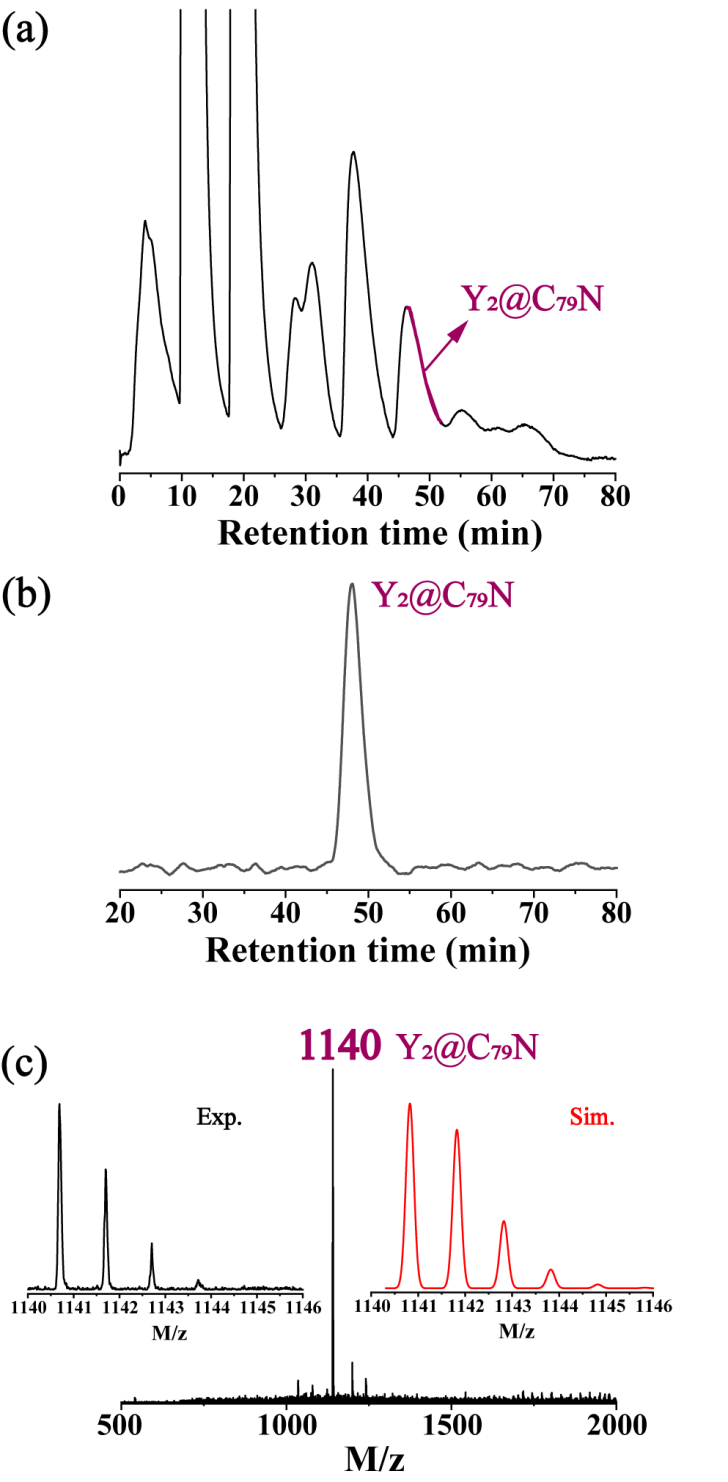


**Figure S1**. (a) The first stage HPLC separation of Y2@C79N (HPLC conditions: 20 mm × 250 mm Buckyprep column; mobile phase toluene; flow rate 12 mL∙min-1; detection wavelength 310 nm). (b) HPLC chromatogram of isolated Y2@C79N (HPLC conditions: 20 mm × 250 mm Buckyprep column; mobile phase toluene; flow rate 12 mL∙min-1; detection wavelength 310 nm). (c) MALDI-TOF mass spectrum of the isolated Y2@C79N sample. The insets show the experimental and simulated isotopic distributions patterns of mass spectrum peak.

**2.EPR measurements of Y2@C79N**

The Y2@C79N was respectively dissolved in 1-chloronaphthalene and 5CB with the same molar concentration, and the samples with equal volume were taken for EPR measurements. The solution was placed into a quartz tube and then implemented to degas by ultrasonic treatments, and finally protective nitrogen gas was filled into the tube. Temperature-dependent EPR spectra were collected on CIQTEK EPR200-Plus with continuous-wave X-band frequency.

**Table S1.** Line widths (Δ*H*pp, Gauss) of three groups of EPR signals for Y2@C79N dissolved in 1-chloronaphthalene measured at different temperatures.

|  | Δ*H*pp | Δ*H*pp | Δ*H*pp |
| --- | --- | --- | --- |
| Temperature (K) | (Low field) | (Centre field) | (High field) |
| 290 K | 6.10 | 6.60 | 6.40 |
| 270 K | 6.00 | 6.30 | 5.60 |
| 250 K | 5.80 | 6.10 | 5.20 |
| 245 K | 6.70 | 6.50 | 5.50 |
| 240 K | 7.50 | 7.00 | 5.70 |
| 235 K | 10.00 | 7.90 | 6.50 |
| 230 K | 13.00 | 10.40 | 7.40 |

**Table S2.** Line widths (Δ*H*pp, Gauss) of three groups of EPR signals for Y2@C79N dissolved in 5CB measured at different temperatures.

|  | Δ*H*pp | Δ*H*pp | Δ*H*pp |
| --- | --- | --- | --- |
| Temperature (K) | (Low field) | (Centre field) | (High field) |
| 320 K | 6.73 | 7.37 | 5.77 |
| 315 K | 7.37 | 6.73 | 6.09 |
| 310 K | 6.73 | 6.41 | 6.09 |
| 305 K | 6.41 | 6.73 | 5.45 |
| 300 K | 6.73 | 6.73 | 5.45 |
| 295 K | 6.41 | 6.73 | 5.45 |
| 290 K | 6.73 | 7.05 | 5.77 |
| 280 K | 8.65 | 8.65 | 7.37 |
| 270 K | 17.62 | 13.77 | 10.89 |


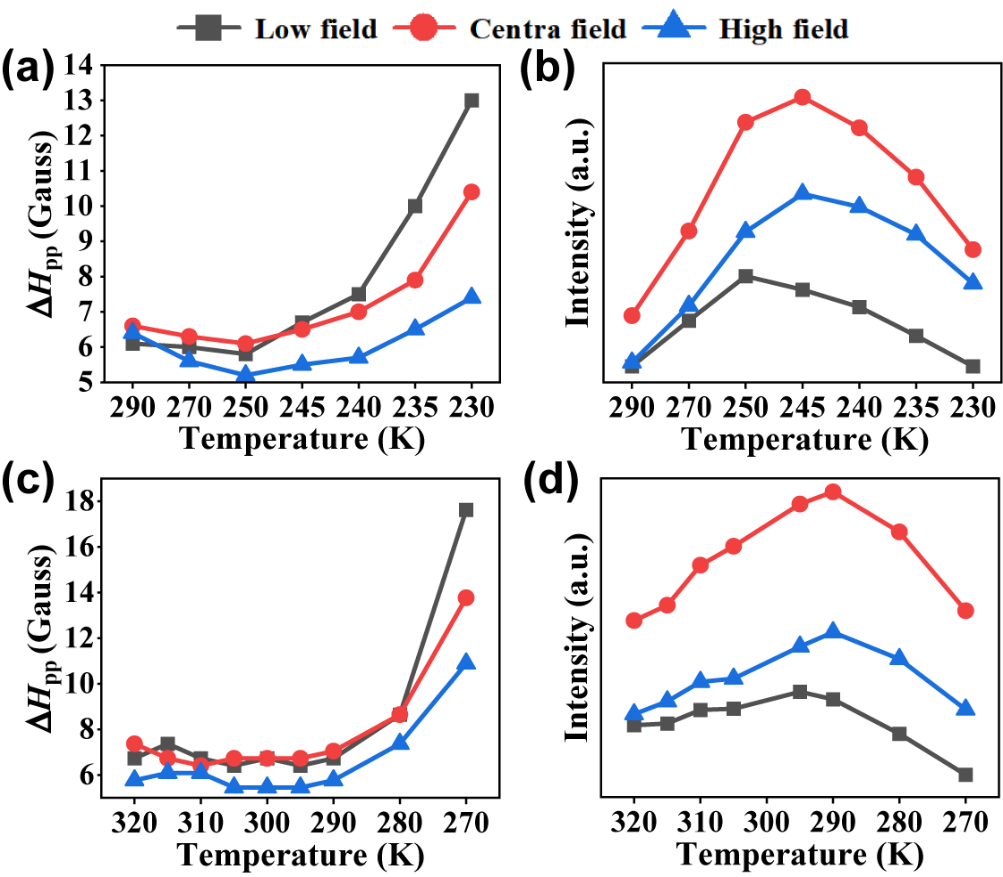


**Figure S2**. Temperature dependence of the signal (a) linewidth and (b) intensity for Y2@C79N dissolved in 1-chloronaphthalene. Temperature dependence of the signal (c) linewidth and (d) intensity for Y2@C79N dissolved in 5CB.

**3.XRD and POM measurements of solvents**

For 1-chloronaphthalene and 5CB, X-ray diffraction (XRD) experiments were performed by in-situ XRD instrument with a temperature controller. The PANalytical Empyrean X-ray diffractometer was employed for the characterization of samples. A volume of 100 μL of the solvent was placed in a custom-designed sample cell and positioned on the sample stage for analysis. To achieve temperature control, a low-temperature nitrogen gas was used to establish an equilibrium atmosphere. A temperature probe was positioned in close proximity to the sample surface to monitor the environmental temperature. Spectra were acquired for each sample at different temperatures, with a stabilization period of ten minutes at each temperature.

The polarized-light optical microscope (POM) imaging of was performed under varied temperatures. An Olympus BX51 polarized-light optical microscope (POM) equipped with a charge-coupled device (CCD) digital camera and a Linkam THMS-600 heating stage was used to detect the crystallization of 1-chloronaphthalene and 5CB. The sample (3 μL) was putted in the middle of two slides. The sample was cooled at a rate of 5 K/min.


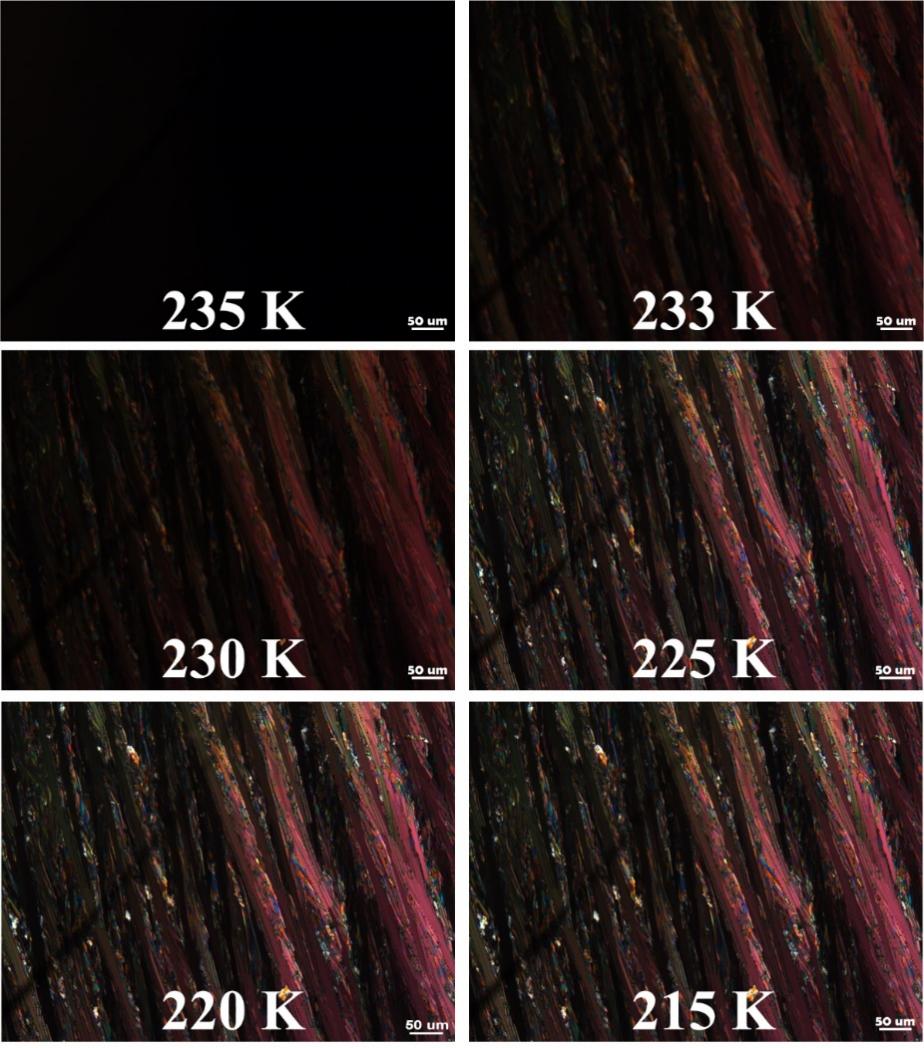


**Figure S3**. In-situ polarized-light optical microscope (POM) pictures of 1-chloronaphthalene at different temperatures.


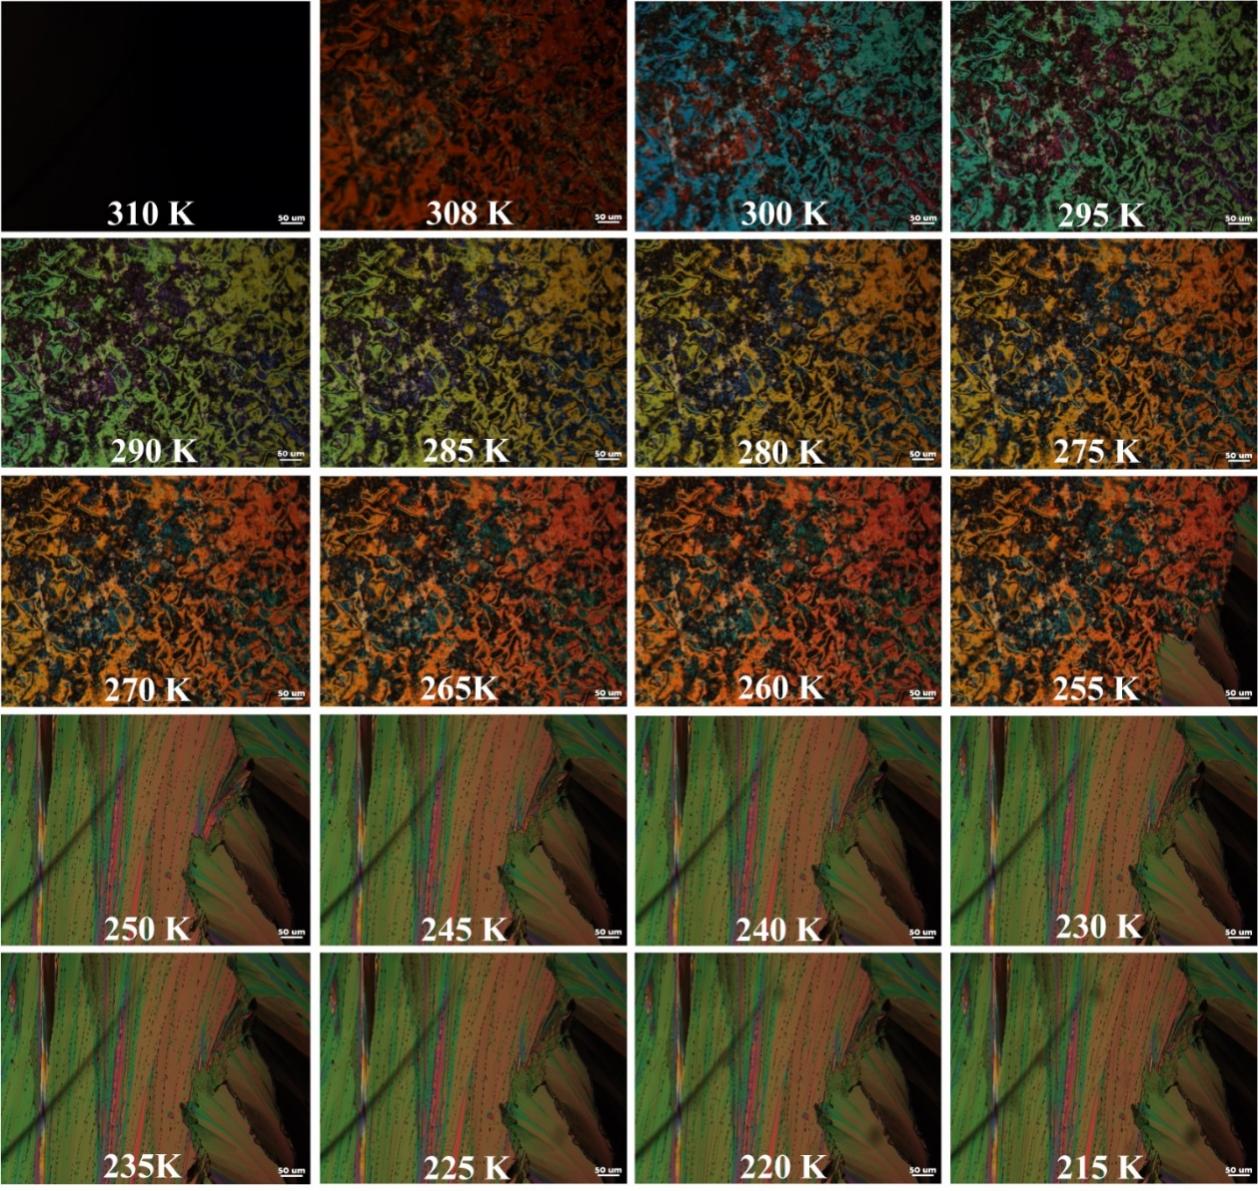


**Figure S4**. In-situ polarized-light optical microscope (POM) pictures of 5CB at different temperatures.
